# Supplementary material for: Teaching during a pandemic: do university teachers prefer online teaching?
Source: PubMed Central journal article supplement — Heliyon. 2021 Dec 24;8(1):e08663. doi: 10.1016/j.heliyon.2021.e08663 (PMC8741442; doi:10.1016/j.heliyon.2021.e08663), 2021-12-24

# Survey on University Teachers' Attitude towards Online Teaching during Covid-19

All the information will be used only for study purpose. This won't be disclosed or shared with anyone.

---

\* Required

1. Gender \*

*Mark only one oval.*

Female

Male

2. Age \*

\_\_\_\_\_

3. Last completed academic education \*

*Mark only one oval.*

Honor's/BSc/BS

Master's/MSc/MS

PhD

Post-doc

Other: \_\_\_\_\_

## 4. Academic background \*

*Mark only one oval.*

Science

Arts

Commerce

Other: \_\_\_\_\_

## 5. Teaching Experience (years) \*

\_\_\_\_\_

## 6. Current Designation \*

*Mark only one oval.*

Lecturer

Assistant Professor

Associate Professor

Professor

## 7. Type of University \*

*Mark only one oval.*

Public

Private

## 8. Name of University (use acronyms, e.g. DU, BAU, etc.) \*

\_\_\_\_\_

9. Current place of residence \*

*Mark only one oval.*

- Rural
- Urban
- Sub-urban

### Online Teaching Experiences

10. Taking online classes either home or office during the COVID-19 Pandemic \*

*Mark only one oval.*

- Yes
- No

11. Numbers of online courses taken \*

---

12. Hours of online classes taken per week \*

---

13. Attended training for online classes \*

*Mark only one oval.*

- Yes
- No

14. Gadget used for taking online classes \*

*Mark only one oval.*

- Laptop/Desktop Computer
- Smartphone
- Tab

15. Internet connection used for online classes \*

*Mark only one oval.*

- Broadband
- Mobile/Cellular

16. Platforms used for online classes (You can choose multiple responses) \*

*Check all that apply.*

- Zoom Cloud Meeting
- Google Meet
- Skype
- Google Classroom

Other:  \_\_\_\_\_

17. Type of Classes taken \*

*Mark only one oval.*

- Theoretical
- Practical
- Both

18. Attendance level of your students \*

*Mark only one oval.*

Below 40%

41%-60%

61%-80%

Above 80%

19. Taken any online examinations? \*

*Mark only one oval.*

Yes

No

20. If yes, what was the type of examination? (otherwise skip)

*Check all that apply.*

Quiz

Written

Assignments/projects

Open book exam

Other:  \_\_\_\_\_

What do you think of online teaching according to you experiences?

21. Please mark your response on the following aspects of online teaching. \*

Mark only one oval per row.

|                                              | Strongly Disagree     | Disagree              | Neutral               | Agree                 | Strongly agree        |
|----------------------------------------------|-----------------------|-----------------------|-----------------------|-----------------------|-----------------------|
| Online teaching is attractive.               | <input type="radio"/> |
| Online teaching is effective during pandemic | <input type="radio"/> |
| Better communication with students           | <input type="radio"/> |
| Better student-instructor interaction        | <input type="radio"/> |
| More time efficient                          | <input type="radio"/> |
| Effective compared to conventional learning  | <input type="radio"/> |
| Easy to share the materials                  | <input type="radio"/> |
| No difficulty faced delivering content       | <input type="radio"/> |
| No difficulty in monitoring students         | <input type="radio"/> |
| No difficulty in practical work              | <input type="radio"/> |
| Useful for evaluation                        | <input type="radio"/> |
| Higher interest among students               | <input type="radio"/> |

Challenges faced during online teaching

## 22. Please mark your response on the severity of challenges. \*

*Mark only one oval per row.*

|                                     | No                    | Low                   | Medium                | High                  |
|-------------------------------------|-----------------------|-----------------------|-----------------------|-----------------------|
| Lack of proper guideline            | <input type="radio"/> | <input type="radio"/> | <input type="radio"/> | <input type="radio"/> |
| Lack of ICT infrastructure          | <input type="radio"/> | <input type="radio"/> | <input type="radio"/> | <input type="radio"/> |
| Poor internet connectivity          | <input type="radio"/> | <input type="radio"/> | <input type="radio"/> | <input type="radio"/> |
| Lack of training                    | <input type="radio"/> | <input type="radio"/> | <input type="radio"/> | <input type="radio"/> |
| Difficulty in delivering content    | <input type="radio"/> | <input type="radio"/> | <input type="radio"/> | <input type="radio"/> |
| Lack of student engagement          | <input type="radio"/> | <input type="radio"/> | <input type="radio"/> | <input type="radio"/> |
| Difficulty in monitoring students   | <input type="radio"/> | <input type="radio"/> | <input type="radio"/> | <input type="radio"/> |
| Difficulty in practical work        | <input type="radio"/> | <input type="radio"/> | <input type="radio"/> | <input type="radio"/> |
| Less participation of students      | <input type="radio"/> | <input type="radio"/> | <input type="radio"/> | <input type="radio"/> |
| Students' low-interest              | <input type="radio"/> | <input type="radio"/> | <input type="radio"/> | <input type="radio"/> |
| Insufficient feedback               | <input type="radio"/> | <input type="radio"/> | <input type="radio"/> | <input type="radio"/> |
| Less student-instructor interaction | <input type="radio"/> | <input type="radio"/> | <input type="radio"/> | <input type="radio"/> |
| Less useful for evaluation          | <input type="radio"/> | <input type="radio"/> | <input type="radio"/> | <input type="radio"/> |
| Limited technological experience    | <input type="radio"/> | <input type="radio"/> | <input type="radio"/> | <input type="radio"/> |
| Time consuming                      | <input type="radio"/> | <input type="radio"/> | <input type="radio"/> | <input type="radio"/> |

Suggestions/Opinions

23. Which mode of teaching do you prefer during covid-19 pandemic? \*

*Mark only one oval.*

- Online Teaching
- Physical
- Both
- Other: \_\_\_\_\_

24. Which mode of teaching would you prefer post covid-19 pandemic? \*

*Mark only one oval.*

- Online Teaching
- Physical
- Both
- Other: \_\_\_\_\_

25. Please give your valued suggestions/opinions regarding online teaching. (optional)

---

---

---

---

---

---

This content is neither created nor endorsed by Google.

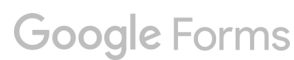

Supplement: mmc1.pdf [file mmc1.pdf]
